# Supplementary material for: Synthesis of a new type of alkene metal complex using face-capping thione-alkene ligands
Source: Royal Society of Chemistry journal article supplement (doi:10.1039/c5dt01311a), 2015-01-01
Supplement: c5dt01311a1.pdf [file c5dt01311a1.pdf]

## **Supporting Information for**

# **Synthesis of a new type of alkene metal complex using face-capping thione-alkene ligands**

### **Table of content**

|                                                                  |                    |
|------------------------------------------------------------------|--------------------|
| <b>Experimental details</b>                                      | <b>Page S2-6</b>   |
| <b>Structures of complexes, Figure S1-S2</b>                     | <b>Page S7</b>     |
| <b>Selected NMR Spectra</b>                                      | <b>Page S8-11</b>  |
| <b>Selected bond lengths (Å) and bond angles (°) Table S1-S3</b> | <b>Page S12</b>    |
| <b>X-ray crystallography details, Table S4-S10</b>               | <b>Page S13-19</b> |

### General:

All reagents and solvents were purchased from commercial sources and used as supplied unless otherwise mentioned. The starting materials  $[\text{Cp}^*\text{MCl}_2]_2$  ( $\text{M} = \text{Ir}, \text{Rh}$ )<sup>1</sup> and  $[\text{trans-1,4-di-(1-methyl-imidazoium-3N)-2-butene}][\text{Br}]_2$ <sup>2</sup> were prepared by literature method.  $[\text{trans-1,4-di-(1-vinyl-imidazoium-3N)-2-butene}][\text{Br}]_2$  was synthesized as described in literature<sup>2</sup> by using 1-vinylimidazole instead of 1-methylimidazole. Elemental analyses were performed on an Elementar Vario EL III analyzer. IR spectra were recorded on a Nicolet AVATAR-360IR spectrometer. NMR spectra were recorded on a Bruker DMX-400 Spectrometer. Proton chemical shift ( $\delta\text{H} = 7.26$  ( $\text{CDCl}_3$ ), 3.31 ( $\text{CD}_3\text{OD}$ )) and  $\delta\text{C}$  values (77.16 ( $\text{CDCl}_3$ ), 49.00 ( $\text{CD}_3\text{OD}$ )) are reported relative to the solvent residual peak. ESI-MS spectra were recorded on a Micro TOF II mass spectrometer using electrospray ionization.

### Ligand synthesis:

**L1:** In a 100 mL round-bottomed flask fitted with reflux condenser were placed. Sulfur powder (64 mg, 2 mmol),  $\text{K}_2\text{CO}_3$  (300 mg) were added to a solution of  $[\text{trans-1,4-di-(1-methyl-imidazoium-3N)-2-butene}][\text{Br}]_2$  (378 mg, 1 mmol) in  $\text{CH}_3\text{OH}$  (30 mL). The mixture was allowed to reflux for 24 h after which the methanol was removed with a rotary evaporator. The remaining solid was shaken with  $2 \times 30$  mL  $\text{CH}_2\text{Cl}_2$  which was then filtered and rotary evaporated. The product was recrystallized from  $\text{CH}_2\text{Cl}_2/\text{MeOH}$  to give colorless solid. Yield: (140 mg, 50%). Anal. Calcd for  $\text{C}_{12}\text{H}_{16}\text{N}_4\text{S}_2$ : C, 51.40; H, 5.75; N, 19.98; Found: C, 51.30; H, 5.76; N, 19.91.  $^1\text{H}$  NMR (400 MHz,  $\text{CDCl}_3$ , ppm):  $\delta = 3.58$  (s, 6H), 4.65 (m, 4H), 5.74 (m, 2H), 6.67 (d, 2H,  $J = 2.4$  Hz), 6.70 (d, 2H,  $J = 2.4$  Hz).  $^{13}\text{C}\{^1\text{H}\}$  NMR (101 MHz,  $\text{CDCl}_3$ , ppm):  $\delta = 35.3, 49.02, 116.55, 118.11, 128.45, 162.50$ . FT-IR spectrum (KBr,  $\nu$ , selected peaks,  $\text{cm}^{-1}$ ): 1153 (C=S).

**L2:** Prepared by the same procedure as described above for L<sub>1</sub>, using sulfur powder (64 mg, 2 mmol),  $\text{K}_2\text{CO}_3$  (300 mg) and  $[\text{trans-1,4-di-(1-vinyl-imidazoium-3N)-2-butene}][\text{Br}]_2$  (402 mg, 1 mmol). L<sub>2</sub> was isolated as a gray solid. Yield: (183 mg, 60%). Anal. Calcd for  $\text{C}_{14}\text{H}_{16}\text{N}_4\text{S}_2$ : C, 55.23; H, 5.30; N, 18.40; Found: C, 55.30; H, 5.26; N, 18.41.  $^1\text{H}$  NMR (400 MHz,  $\text{CDCl}_3$ , ppm):  $\delta = 4.68$  (m, 4H), 4.93 (d, 2H,  $J = 8.8$  Hz), 5.14 (d, 2H,  $J = 16.0$  Hz), 5.76 (m, 2H), 6.77 (s, 2H), 6.98 (s, 2H), 7.53 (dd, 2H,  $J = 8.8, 16.0$  Hz).  $^{13}\text{C}\{^1\text{H}\}$  NMR (101 MHz,  $\text{CDCl}_3$ , ppm):  $\delta = 48.56, 101.11, 112.85, 118.06, 128.32, 130.39$ . FT-IR spectrum (KBr,  $\nu$ , selected peaks,  $\text{cm}^{-1}$ ): 1182 (C=S).

**Synthesis of 1-Cl<sub>2</sub>.** L<sub>1</sub> (28 mg, 0.1 mmol) was added to a solution of  $[\text{Cp}^*\text{IrCl}_2]_2$  (40 mg, 0.05 mmol) in  $\text{CH}_3\text{OH}$  (20 mL) at room temperature and stirred for 24 h. The solvent was concentrated to about 3 mL. Upon the addition of diethyl ether, a yellow solid of 1-Cl<sub>2</sub> was precipitated and collected, and dry in vacuum after washing with

diethyl ether. Yield: 92%. Anal. Calcd for  $C_{22}H_{31}Cl_2IrN_4S_2$ : C, 38.93; H, 4.60; N, 8.25; Found: C, 38.84; H, 4.52; N, 8.19.  $^1H$  NMR (400 MHz,  $CD_3OD$ , ppm):  $\delta$  = 7.51 (d, 1H,  $J$  = 2.0 Hz, imidazole), 7.45 (d, 1H,  $J$  = 2.0 Hz, imidazole), 7.42 (d, 1H,  $J$  = 2.4 Hz, imidazole), 7.35 (d, 1H,  $J$  = 2.4 Hz, imidazole), 5.29-5.25 (m, 1H, -CH=CH-), 5.12-5.07 (m, 1H, -CH<sub>2</sub>-), 4.96-4.92 (m, 1H, -CH<sub>2</sub>-), 4.89-4.85 (m, 1H, -CH<sub>2</sub>-), 3.94-3.90 (m, 1H, -CH=CH-), 3.88 (s, 3H, CH<sub>3</sub>), 3.73 (s, 3H, CH<sub>3</sub>), 3.57-3.50 (m, 1H, -CH<sub>2</sub>-), 1.77 (s, 15H, Cp\*).  $^{13}C\{^1H\}$  NMR (101 MHz,  $CD_3OD$ , ppm):  $\delta$  = 8.38 (Cp\*), 35.90 (CH<sub>3</sub>), 36.36 (CH<sub>3</sub>), 48.79 (-CH<sub>2</sub>-), 52.06 (-CH<sub>2</sub>-), 60.65 (-CH=CH-), 76.85 (-CH=CH-), 104.40 (Cp\*), 122.58 (imidazole), 122.87 (imidazole), 123.19 (imidazole), 146.84 (C=S), 148.48 (C=S). ESI-MS:  $m/z$  = 607.1524 (calcd for  $[M - 2Cl]^+$  607.1533), 643.1287 (calcd for  $[M - Cl]^+$  643.1292). FT-IR spectrum (KBr,  $\nu$ , selected peaks,  $cm^{-1}$ ): 1163 (C=S).

**Synthesis of 1-(OTf)<sub>2</sub>.** AgOTf (51 mg, 0.2 mmol) was added to a solution of  $[Cp^*IrCl_2]_2$  (40 mg, 0.05 mmol) in  $CH_3OH$  (20 mL) at room temperature and stirred for 6 h, followed by filtration to remove AgCl. **L1** (28 mg, 0.1 mmol) was added to the filtrate. The mixture was then stirred at room temperature for 24 h. The solvent was concentrated to about 3 mL. Upon the addition of diethyl ether, a yellow solid of **1-(OTf)<sub>2</sub>** was precipitated and collected, and dry in vacuum after washing with diethyl ether. Yield: 91%. Anal. Calcd for  $C_{24}H_{31}F_6IrN_4O_6S_4$ : C, 31.82; H, 3.45; N, 6.18; Found: C, 31.90; H, 3.47; N, 6.12.  $^1H$  NMR (400 MHz,  $CD_3OD$ , ppm):  $\delta$  = 7.44 (d, 1H,  $J$  = 2.0 Hz, imidazole), 7.41 (d, 1H,  $J$  = 2.0 Hz, imidazole), 7.38 (d, 1H,  $J$  = 2.4 Hz, imidazole), 7.29 (d, 1H,  $J$  = 2.4 Hz, imidazole), 5.22-5.19 (m, 1H, -CH=CH-), 5.06-5.02 (m, 1H, -CH<sub>2</sub>-), 4.92-4.91 (m, 1H, -CH<sub>2</sub>-), 4.91-4.84 (m, 1H, -CH<sub>2</sub>-), 3.94-3.90 (m, 1H, -CH=CH-), 3.87 (s, 3H, CH<sub>3</sub>), 3.72 (s, 3H, CH<sub>3</sub>), 3.55-3.48 (m, 1H, -CH<sub>2</sub>-), 1.75 (s, 15H, Cp\*).  $^{13}C\{^1H\}$  NMR (101 MHz,  $CD_3OD$ , ppm):  $\delta$  = 8.30 (Cp\*), 35.86 (CH<sub>3</sub>), 36.34 (CH<sub>3</sub>), 48.71 (-CH<sub>2</sub>-), 51.94 (-CH<sub>2</sub>-), 60.49 (-CH=CH-), 76.65 (-CH=CH-), 104.43 (Cp\*), 122.50 (imidazole), 122.77 (imidazole), 123.17 (imidazole), 123.21 (imidazole), 146.87 (C=S), 148.55 (C=S). ESI-MS:  $m/z$  = 607.1514 (calcd for  $[M - 2OTf]^+$  607.1533), 757.1126 (calcd for  $[M - OTf]^+$  757.1130). FT-IR spectrum (KBr,  $\nu$ , selected peaks,  $cm^{-1}$ ): 1163 (C=S), 1256, 1029, 638 (OTf).

**Synthesis of 1-(NO<sub>3</sub>)<sub>2</sub>.** Prepared by the same procedure as described above for **1-(OTf)<sub>2</sub>**, using AgNO<sub>3</sub> (34 mg, 0.2 mmol),  $[Cp^*IrCl_2]_2$  (40 mg, 0.05 mmol) and **L1** (28 mg, 0.1 mmol). **1-(NO<sub>3</sub>)<sub>2</sub>** was isolated as a yellow solid. Yield: 88%. Anal. Calcd for  $C_{22}H_{31}IrN_6O_6S_2$ : C, 36.10; H, 4.27; N, 11.48; Found: C, 36.15; H, 4.22; N, 11.53.  $^1H$  NMR (400 MHz,  $CD_3OD$ , ppm):  $\delta$  = 7.46 (d, 1H,  $J$  = 2.0 Hz, imidazole), 7.41 (d, 1H,  $J$  = 2.0 Hz, imidazole), 7.39 (d, 1H,  $J$  = 2.4 Hz, imidazole), 7.30 (d, 1H,  $J$  = 2.4 Hz, imidazole), 5.23-5.20 (m, 1H, -CH=CH-), 5.08-5.03 (m, 1H, -CH<sub>2</sub>-), 4.93-4.88 (m, 1H, -CH<sub>2</sub>-), 4.88-4.83 (m, 1H, -CH<sub>2</sub>-), 3.94-3.90 (m, 1H, -CH=CH-), 3.87 (s, 3H, CH<sub>3</sub>), 3.72 (s, 3H, CH<sub>3</sub>), 3.55-3.48 (m, 1H, -CH<sub>2</sub>-), 1.76 (s, 15H, Cp\*). ESI-MS:  $m/z$  = 607.1516 (calcd for  $[M - 2NO_3]^+$  607.1533). FT-IR spectrum (KBr,  $\nu$ , selected peaks,  $cm^{-1}$ ): 1162 (C=S), 1384 (NO<sub>3</sub><sup>-</sup>).

**Synthesis of 2-Cl<sub>2</sub>.** Prepared by the same procedure as described above for **1-Cl<sub>2</sub>**, using **L2** (30 mg, 0.1 mmol) and [Cp\*IrCl<sub>2</sub>]<sub>2</sub> (40 mg, 0.05 mmol). **2-Cl<sub>2</sub>** was isolated as a yellow solid. Yield: 94%. Anal. Calcd for C<sub>24</sub>H<sub>31</sub>Cl<sub>2</sub>IrN<sub>4</sub>S<sub>2</sub>: C, 41.02; H, 4.45; N, 7.97; Found: C, 41.08; H, 4.43; N, 7.92. <sup>1</sup>H NMR (400 MHz, CD<sub>3</sub>OD, ppm): δ = 7.87 (d, 1H, *J* = 2.4 Hz, imidazole), 7.87 (d, 1H, *J* = 2.4 Hz, imidazole), 7.63 (d, 1H, *J* = 2.4 Hz, imidazole), 7.57 (dd, 1H, *J* = 8.8, 15.6 Hz, N-CH=), 7.46 (d, 1H, *J* = 2.0 Hz, imidazole), 7.26 (dd, 1H, *J* = 8.8, 15.6 Hz, N-CH=), 5.80 (dd, 1H, *J* = 2.4, 15.6 Hz, -CH=CH-), 5.77 (dd, *J* = 2.4, 15.6 Hz, 1H, =CH<sub>2</sub>), 5.41 (dd, 1H, *J* = 2.4, 8.8 Hz, =CH<sub>2</sub>), 5.34 (m, 2H, =CH<sub>2</sub>), 5.10 (dd, 1H, -CH<sub>2</sub>-), 5.00 (dd, 1H, *J* = 3.2, 15.6 Hz, -CH<sub>2</sub>-), 4.93 (dd, 1H, *J* = 1.6, 15.6 Hz, -CH<sub>2</sub>-), 4.11 (td, 1H, *J* = 2.4, 15.6 Hz, -CH=CH-), 3.59 (dd, 1H, *J* = 11.2, 15.6 Hz, -CH<sub>2</sub>-), 1.78 (s, 15H, Cp\*). ESI-MS: *m/z* = 631.1539 (calcd for [M - 2Cl]<sup>+</sup> 631.1533), 667.1292 (calcd for [M - Cl]<sup>+</sup> 667.1298). FT-IR spectrum (KBr, ν, selected peaks, cm<sup>-1</sup>): 1142 (C=S).

**Complex 3-[Cp\*RhCl<sub>3</sub>]Cl.** **L1** (6 mg, 0.02 mmol) was added to a CD<sub>3</sub>OD (0.6 mL) solution of [Cp\*RhCl<sub>2</sub>]<sub>2</sub> (12 mg, 0.02 mmol). Complex **3-[Cp\*RhCl<sub>3</sub>]Cl** is stable in methanol, however, only complex **5** was obtained after removal of solvent.

<sup>1</sup>H NMR (400 MHz, CD<sub>3</sub>OD, ppm): δ = 7.50 (d, 1H, *J* = 2.0 Hz, imidazole), 7.39 (d, 2H, *J* = 2.4 Hz, imidazole), 7.33 (d, 1H, *J* = 2.0 Hz, imidazole), 5.82 (d, 1H, *J* = 12.8 Hz, -CH=CH-), 5.15 (d, 1H, *J* = 16.8 Hz, -CH<sub>2</sub>-), 4.99 (d, 1H, *J* = 15.6 Hz, -CH<sub>2</sub>-), 4.64 (d, 1H, *J* = 16.8 Hz, -CH<sub>2</sub>-), 3.92 (d, 1H, *J* = 12.8 Hz, -CH=CH-), 3.87 (s, 3H, CH<sub>3</sub>), 3.69 (s, 3H, CH<sub>3</sub>), 3.63 (dd, 1H, *J* = 11.2, 16.4 Hz, -CH<sub>2</sub>-), 1.75 (s, 15H, Cp\*), 1.64 (br, 15H, Cp\*). <sup>13</sup>C{<sup>1</sup>H} NMR (101 MHz, CD<sub>3</sub>OD, ppm): δ = 9.02 (Cp\*), 9.41 (Cp\*), 36.01 (CH<sub>3</sub>), 36.26 (CH<sub>3</sub>), 50.01 (-CH<sub>2</sub>-), 51.69 (-CH<sub>2</sub>-), 81.82 (-CH=CH-), 97.67 (-CH=CH-), 108.50 (Cp\*), 122.02(imidazole), 122.49 (imidazole), 123.18(imidazole), 123.42 (imidazole), 150.54 (C=S), 151.18 (C=S). ESI-MS (solvent: methanol): *m/z* = 272.9920 (calcd for [Cp\*RhCl]<sup>+</sup> 272.9912), 517.0958 (calcd for [M - Cp\*RhCl<sub>4</sub>]<sup>+</sup> 517.0961), 667.0570 (calcd for [M - Cp\*RhCl<sub>3</sub>]<sup>+</sup> 667.0560), 863.0307 (calcd for [M - Cl]<sup>+</sup> 863.0306).

**Complex 5:** **L1** (28 mg, 0.1 mmol) was added to a solution of [Cp\*RhCl<sub>2</sub>]<sub>2</sub> (62 mg, 0.1 mmol) in CH<sub>2</sub>Cl<sub>2</sub> at room temperature, the mixture was stirred at room temperature for 1 h. Red solids were collected after removal of solvent. Yield: 90%. Anal. Calcd for C<sub>32</sub>H<sub>46</sub>Cl<sub>4</sub>Rh<sub>2</sub>N<sub>4</sub>S<sub>2</sub>: C, 42.78; H, 5.16; N, 6.24; Found: C, 42.74; H, 5.17; N, 6.30. <sup>1</sup>H NMR (400 MHz, CDCl<sub>3</sub>, ppm): δ = 1.66 (s, 30H, Cp\*), 3.70 (s, 6H), 4.83 (s, 4H), 5.96 (s, 2H), 6.83 (s, 2H), 6.93 (s, 2H). FT-IR spectrum (KBr, ν, selected peaks, cm<sup>-1</sup>): 1141 (C=S).

**Synthesis of 3-(OTf)<sub>2</sub>.** Prepared by the same procedure as described above for **2-(OTf)<sub>2</sub>**, using AgOTf (51 mg, 0.2 mmol), [Cp\*RhCl<sub>2</sub>]<sub>2</sub> (31 mg, 0.05 mmol) and **L1** (28 mg, 0.1 mmol). **3-(OTf)<sub>2</sub>** was isolated as an orange red solid. Yield: 91%. Anal. Calcd for C<sub>24</sub>H<sub>31</sub>F<sub>6</sub>RhN<sub>4</sub>O<sub>6</sub>S<sub>4</sub>: C, 35.30; H, 3.83; N, 6.86; Found: C, 35.29; H, 3.87; N, 6.82. <sup>1</sup>H NMR (400 MHz, CD<sub>3</sub>OD, ppm): δ = 7.45 (d, 1H, *J* = 2.4 Hz, imidazole), 7.37-7.36 (m, 2H, imidazole), 7.28 (d, 1H, *J* = 2.8 Hz, imidazole), 5.78 (d, 1H, *J* =

13.6 Hz, -CH=CH-), 5.09 (d, 1H,  $J = 14.8$  Hz, -CH<sub>2</sub>-), 4.95 (d, 1H,  $J = 8.4$  Hz, -CH<sub>2</sub>-), 4.64 (d, 1H,  $J = 8.4$  Hz, -CH<sub>2</sub>-), 3.94-3.88 (m, 1H, -CH=CH-), 3.86 (s, 3H, CH<sub>3</sub>), 3.69 (s, 3H, CH<sub>3</sub>), 3.63 (dd, 1H,  $J = 8.8, 16.4$  Hz, -CH<sub>2</sub>-), 1.74 (s, 15H, Cp\*). <sup>13</sup>C{<sup>1</sup>H} NMR (101 MHz, CD<sub>3</sub>OD, ppm):  $\delta = 8.96$  (Cp\*), 35.98 (CH<sub>3</sub>), 36.26 (CH<sub>3</sub>), 49.95 (-CH<sub>2</sub>-), 51.57 (-CH<sub>2</sub>-), 81.77 (-CH=CH-), 97.47 (-CH=CH-), 108.53 (Cp\*), 121.95 (imidazole), 122.40 (imidazole), 123.17 (imidazole), 123.44 (imidazole), 150.55 (C=S), 151.22 (C=S). ESI-MS:  $m/z = 517.0975$  (calcd for [M - 2OTf]<sup>+</sup> 517.0961), 667.0570 (calcd for [M - OTf]<sup>+</sup> 667.0560). FT-IR spectrum (KBr,  $\nu$ , selected peaks, cm<sup>-1</sup>): 1154 (C=S), 1265, 1030, 638 (OTf).

**Synthesis of 4-[Cp\*RhCl<sub>3</sub>]Cl. L2** (6 mg, 0.02 mmol) was added to a CD<sub>3</sub>OD (0.6 mL) solution of [Cp\*RhCl<sub>2</sub>]<sub>2</sub> (12 mg, 0.02 mmol). Complex 4-[Cp\*RhCl<sub>3</sub>]Cl is stable in methanol, however, only complex 6 was obtained after removal of solvent.

<sup>1</sup>H NMR (400 MHz, CD<sub>3</sub>OD, ppm):  $\delta = 7.85$  (d, 1H,  $J = 2.4$  Hz, imidazole), 7.82 (d, 1H,  $J = 2.4$  Hz, imidazole), 7.63 (d, 1H,  $J = 2.4$  Hz, imidazole), 7.58 (dd, 1H,  $J = 8.8, 15.6$  Hz, N-CH=), 7.45 (d, 1H,  $J = 2.4$  Hz, imidazole), 7.25 (dd, 1H,  $J = 8.8, 15.6$  Hz, N-CH=), 5.91 (d, 1H,  $J = 13.2$  Hz, -CH=CH-), 5.77 (dd,  $J = 2.0, 12.8$  Hz, 1H, =CH<sub>2</sub>), 5.73 (dd, 1H,  $J = 2.4, 13.2$  Hz, =CH<sub>2</sub>), 5.39 (dd, 1H,  $J = 2.4, 8.8$  Hz, =CH<sub>2</sub>), 5.31 (dd,  $J = 2.4, 8.8$  Hz, 1H, =CH<sub>2</sub>), 5.19 (d, 1H,  $J = 16.4$  Hz, -CH<sub>2</sub>-), 5.06 (d, 1H,  $J = 16.0$  Hz, -CH<sub>2</sub>-), 4.67 (d, 1H,  $J = 16.8$  Hz, -CH<sub>2</sub>-), 4.10 (t, 1H,  $J = 12.0$  Hz, -CH=CH-), 3.68 (dd, 1H,  $J = 10.8, 16.4$  Hz, -CH<sub>2</sub>-), 1.77 (s, 15H, Cp\*), 1.64 (s, 15H, Cp\*). ESI-MS:  $m/z = 272.9919$  (calcd for [Cp\*RhCl]<sup>+</sup> 272.9912), 541.0960 (calcd for [M - Cp\*RhCl<sub>4</sub>]<sup>+</sup> 541.0961), 885.0363 (calcd for [M - Cl]<sup>+</sup> 885.0334).

Complex 6: **L2** (30 mg, 0.1 mmol) was added to a solution of [Cp\*RhCl<sub>2</sub>]<sub>2</sub> (62 mg, 0.1 mmol) in CH<sub>2</sub>Cl<sub>2</sub> at room temperature, the mixture was stirred at room temperature for 1 h. Red solids were collected after removal of solvent. Yield: 92%. Anal. Calcd for C<sub>34</sub>H<sub>46</sub>Cl<sub>4</sub>Rh<sub>2</sub>N<sub>4</sub>S<sub>2</sub>: C, 44.27; H, 5.03; N, 6.07; Found: C, 44.28; H, 5.05; N, 6.02. <sup>1</sup>H NMR (400 MHz, CDCl<sub>3</sub>, ppm):  $\delta = 1.65$  (s, 30H), 4.81 (s, 4H), 5.00 (d, 2H,  $J = 8.8$  Hz), 5.25 (d, 2H,  $J = 16.0$  Hz), 5.94 (s, 2H), 7.01 (s, 2H), 7.15 (s, 2H), 7.56 (dd, 2H,  $J = 8.8, 16.0$  Hz). FT-IR spectrum (KBr,  $\nu$ , selected peaks, cm<sup>-1</sup>): 1130 (C=S).

**Synthesis of 4-(OTf)<sub>2</sub>.** Prepared by the same procedure as described above for 3-(OTf)<sub>2</sub>, using AgOTf (51 mg, 0.2 mmol), [Cp\*RhCl<sub>2</sub>]<sub>2</sub> (31 mg, 0.05 mmol) and **L2** (30 mg, 0.1 mmol). 4-(OTf)<sub>2</sub> was isolated as an orange red solid. Yield: 90%. Anal. Calcd for C<sub>26</sub>H<sub>31</sub>F<sub>6</sub>RhN<sub>4</sub>O<sub>6</sub>S<sub>4</sub>: C, 37.14; H, 3.72; N, 6.66; Found: C, 37.12; H, 3.77; N, 6.62. <sup>1</sup>H NMR (400 MHz, CD<sub>3</sub>OD, ppm):  $\delta = 7.82$  (d, 1H,  $J = 2.4$  Hz, imidazole), 7.79 (d, 1H,  $J = 2.8$  Hz, imidazole), 7.59 (dd, 1H,  $J = 8.8, 15.6$  Hz, N-CH=), 7.56 (d, 1H,  $J = 2.8$  Hz, imidazole), 7.40 (d, 1H,  $J = 2.4$  Hz, imidazole), 7.24 (dd, 1H,  $J = 8.8, 15.6$  Hz, N-CH=), 5.85 (d, 1H,  $J = 13.6$  Hz, -CH=CH-), 5.76 (dd,  $J = 2.4, 12.8$  Hz, 1H, =CH<sub>2</sub>), 5.72 (dd, 1H,  $J = 2.4, 12.8$  Hz, =CH<sub>2</sub>), 5.39 (dd, 1H,  $J = 2.4, 8.8$  Hz, =CH<sub>2</sub>), 5.30 (dd,  $J = 2.4, 8.8$  Hz, 1H, =CH<sub>2</sub>), 5.11 (dd, 1H, -CH<sub>2</sub>-), 5.00 (d, 1H,  $J = 16.4$  Hz, -CH<sub>2</sub>-), 4.68 (d, 1H,  $J = 16.4$  Hz, -CH<sub>2</sub>-), 4.12 (t, 1H,  $J = 11.6$  Hz, -CH=CH-), 3.68 (dd,

$^1\text{H}$ ,  $J = 10.8, 16.4$  Hz,  $-\text{CH}_2-$ ), 1.75 (s, 15H, Cp\*).  $^{13}\text{C}\{^1\text{H}\}$  NMR (101 MHz,  $\text{CD}_3\text{OD}$ , ppm):  $\delta = 9.03$  (Cp\*), 49.89 ( $-\text{CH}_2-$ ), 51.58 ( $-\text{CH}_2-$ ), 82.15 ( $-\text{CH}=\text{CH}-$ ), 97.31 ( $-\text{CH}=\text{CH}-$ ), 108.29 ( $=\text{CH}_2$ ), 108.62 ( $=\text{CH}_2$ ), 108.97 (Cp\*), 118.42 (imidazole), 118.51 (imidazole), 123.48 (imidazole), 123.82 (imidazole), 129.47 ( $-\text{N}-\text{CH}=\text{}$ ), 129.65 ( $\text{N}-\text{CH}=\text{}$ ), 150.77 (C=S), 151.24 (C=S). ESI-MS:  $m/z = 541.0975$  (calcd for  $[\text{M} - 2\text{OTf}]^+$  541.0961), 691.0570 (calcd for  $[\text{M} - \text{OTf}]^+$  691.0560). FT-IR spectrum (KBr,  $\nu$ , selected peaks,  $\text{cm}^{-1}$ ): 1158 (C=S), 1260, 1030, 637 (OTf).

**Synthesis of 7-Cl.** Prepared by the same procedure as described above for **1a**, using **L1** (28 mg, 0.1 mmol) and  $\text{PdCl}_2$  (18 mg, 0.1 mmol). **7-Cl** was isolated as a red solid. Yield: 91%. Anal. Calcd for  $\text{C}_{12}\text{H}_{16}\text{Cl}_2\text{PdN}_4\text{S}_2$ : C, 31.49; H, 3.52; N, 12.24; Found: C, 31.42; H, 3.56; N, 12.22.  $^1\text{H}$  NMR (400 MHz,  $\text{CD}_3\text{OD}$ , ppm):  $\delta = 7.41$  (d, 2H,  $J = 2.0$  Hz, imidazole), 7.37 (d, 2H,  $J = 2.0$  Hz, imidazole), 5.20 (s, 2H,  $-\text{CH}=\text{CH}-$ ), 4.85 (q, 4H,  $J = 16.0$  Hz,  $-\text{CH}_2-$ ), 3.78 (s, 6H,  $\text{CH}_3$ ). ESI-MS:  $m/z = 384.9773$  (calcd for  $[\text{M} - 2\text{Cl}]^+$  384.9771). FT-IR spectrum (KBr,  $\nu$ , selected peaks,  $\text{cm}^{-1}$ ): 1148 (C=S).

1 C. White, A. Yates and P. M. Maitlis, *Inorg. Synth.*, 1992, **29**, 228.

2 S. A. Shackelford, J. L. Belletire, J. A. Boatz, S. Schneider, A. K. Wheaton, B. A. Wight, H. L. Ammon, D. V. Peryshkov and S. H. Strauss, *Org. Lett.*, 2010, **12**, 2714.

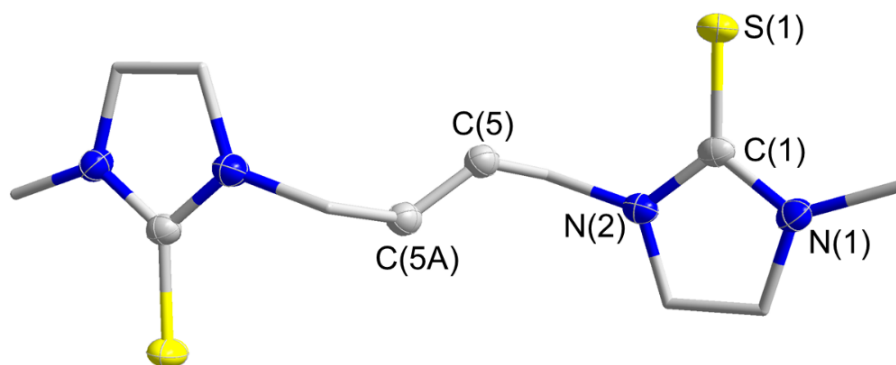

**Fig. S1** Molecular structure and numbering scheme of **L1**; thermal ellipsoids shown at 50% probability. Hydrogen atoms are omitted for clarity.

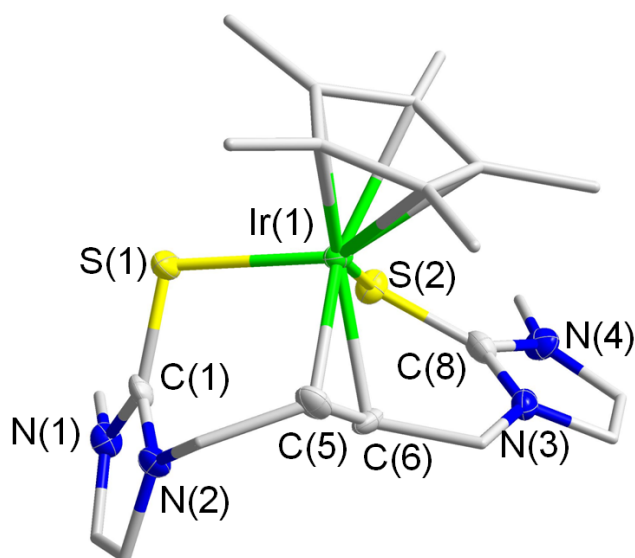

**Fig. S2** Molecular structure and numbering scheme of **1-(NO<sub>3</sub>)<sub>2</sub>**; thermal ellipsoids shown at 50% probability. Hydrogen atoms, anions and solvent molecules are omitted for clarity.

## Selected NMR Spectra

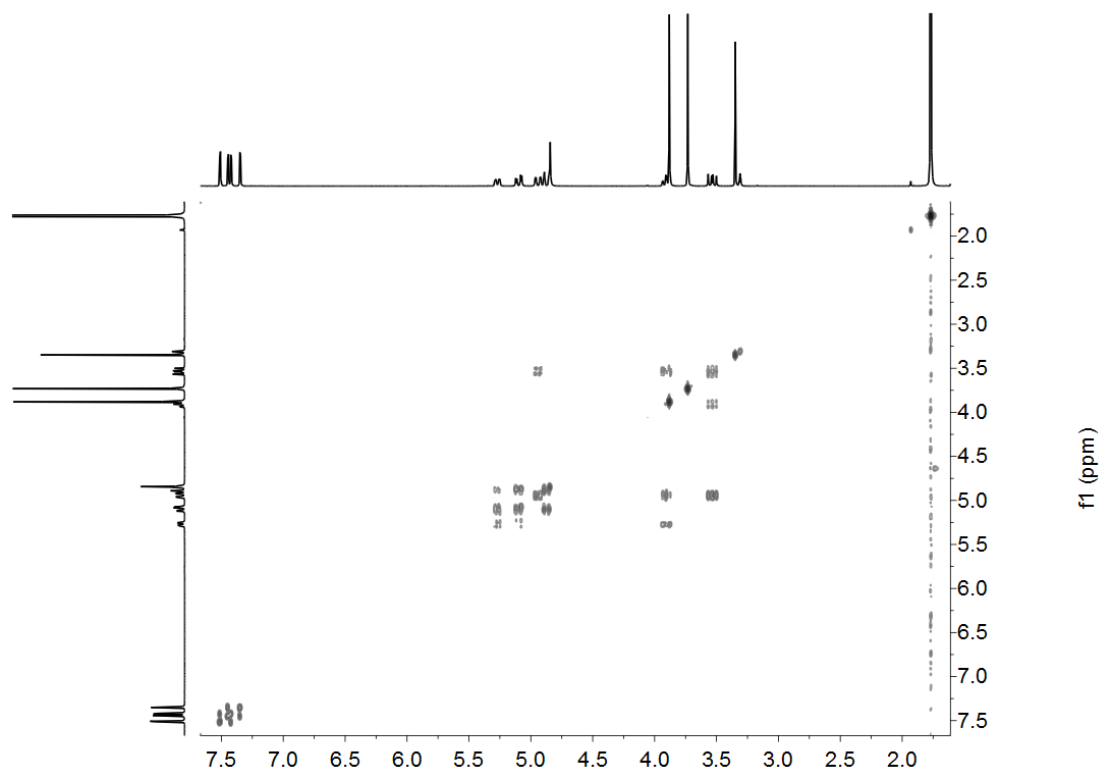

**Fig. S3**  $^1\text{H}$ - $^1\text{H}$  COSY NMR spectrum for **1-Cl<sub>2</sub>** (400 MHz, CD<sub>3</sub>OD).

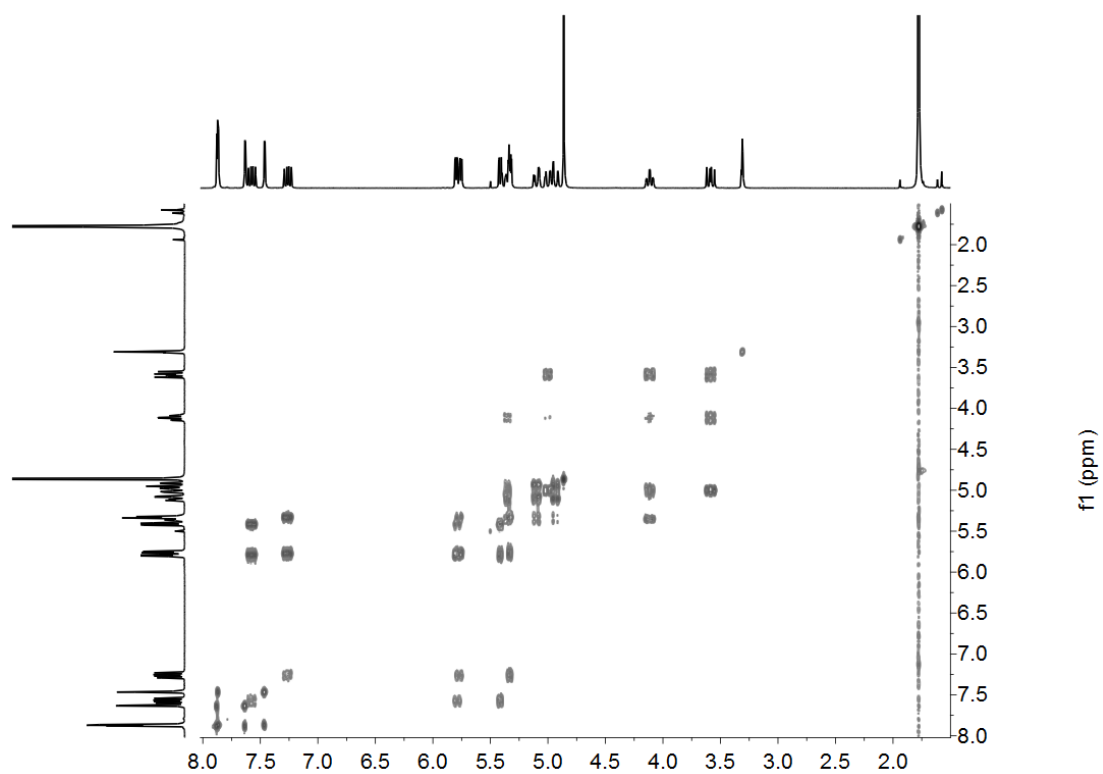

**Fig. S4**  $^1\text{H}$ - $^1\text{H}$  COSY NMR spectrum for **2-Cl<sub>2</sub>** (400 MHz, CD<sub>3</sub>OD).



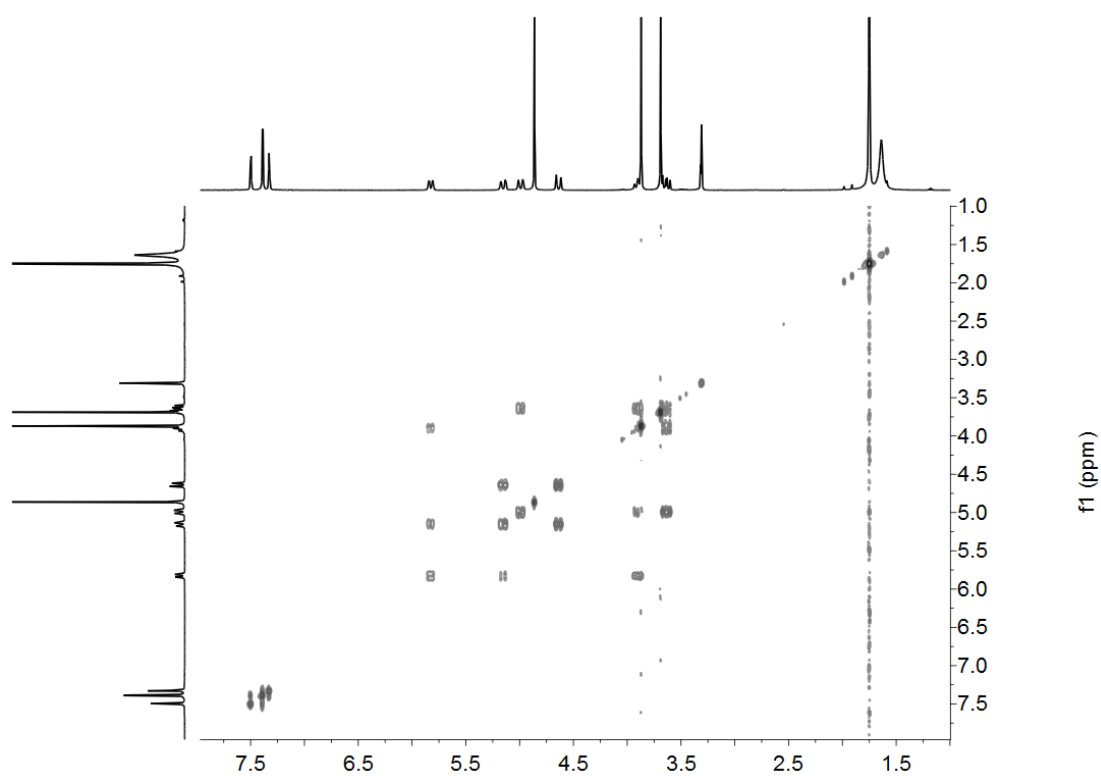

**Fig. S5**  $^1\text{H}$ - $^1\text{H}$  COSY NMR spectrum for **3**- $[\text{Cp}^*\text{RhCl}_3]\text{Cl}$  (400 MHz,  $\text{CD}_3\text{OD}$ ).

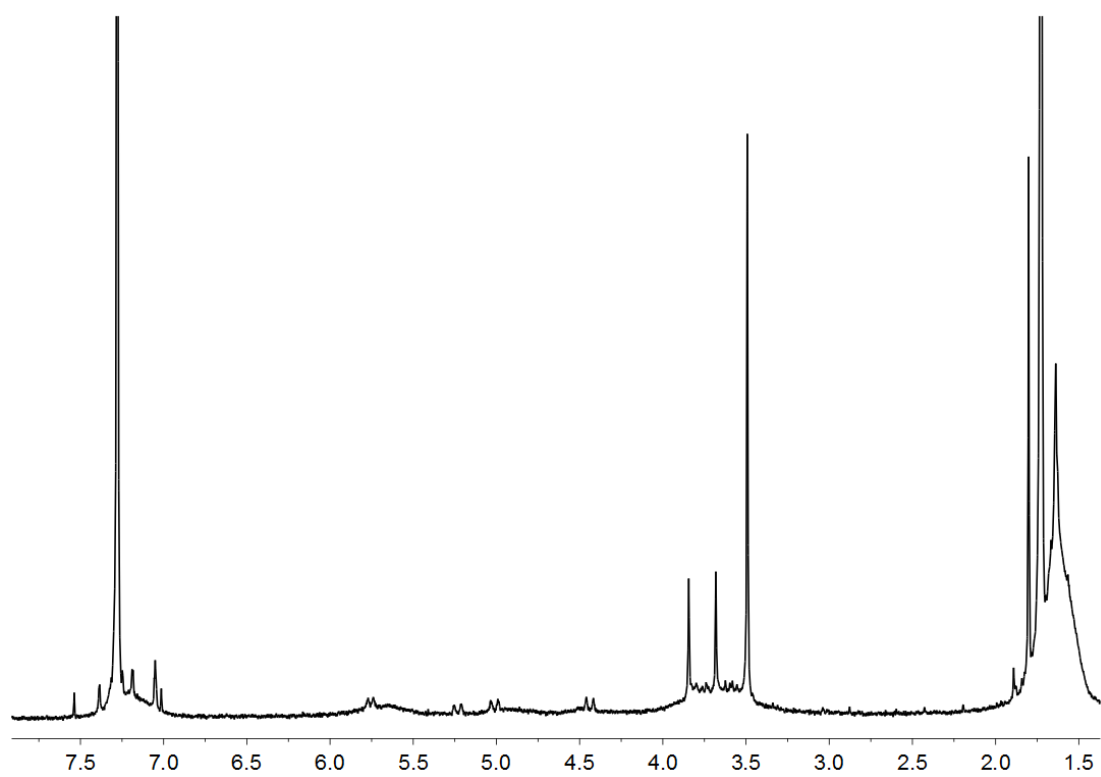

**Fig. S6**  $^1\text{H}$  NMR (400 MHz,  $\text{CDCl}_3$ ) spectrum for the mixture of **3**- $(\text{OTf})_2$  and  $[\text{Cp}^*\text{Rh}(\text{OTf})_2]$  in 1:1 ratio (the solubility of the mixture is limited in  $\text{CDCl}_3$ ).

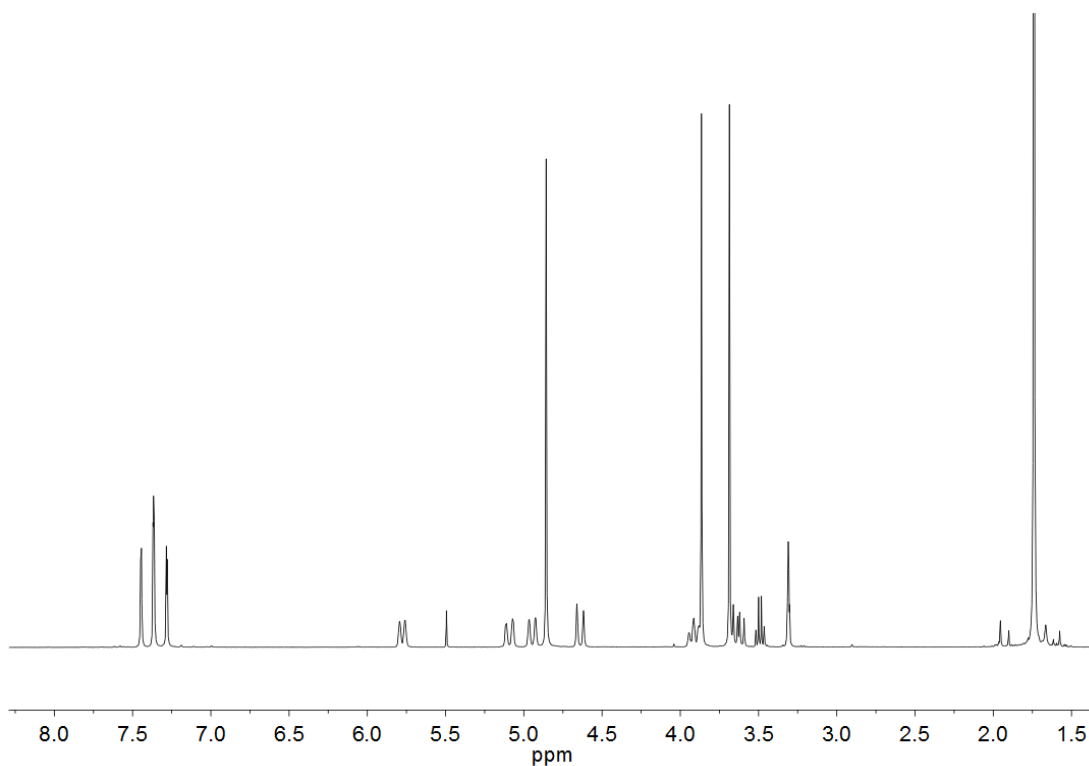

**Fig. S7**  $^1\text{H}$  NMR (400 MHz,  $\text{CD}_3\text{OD}$ ) for **3-(OTf) $_2$**

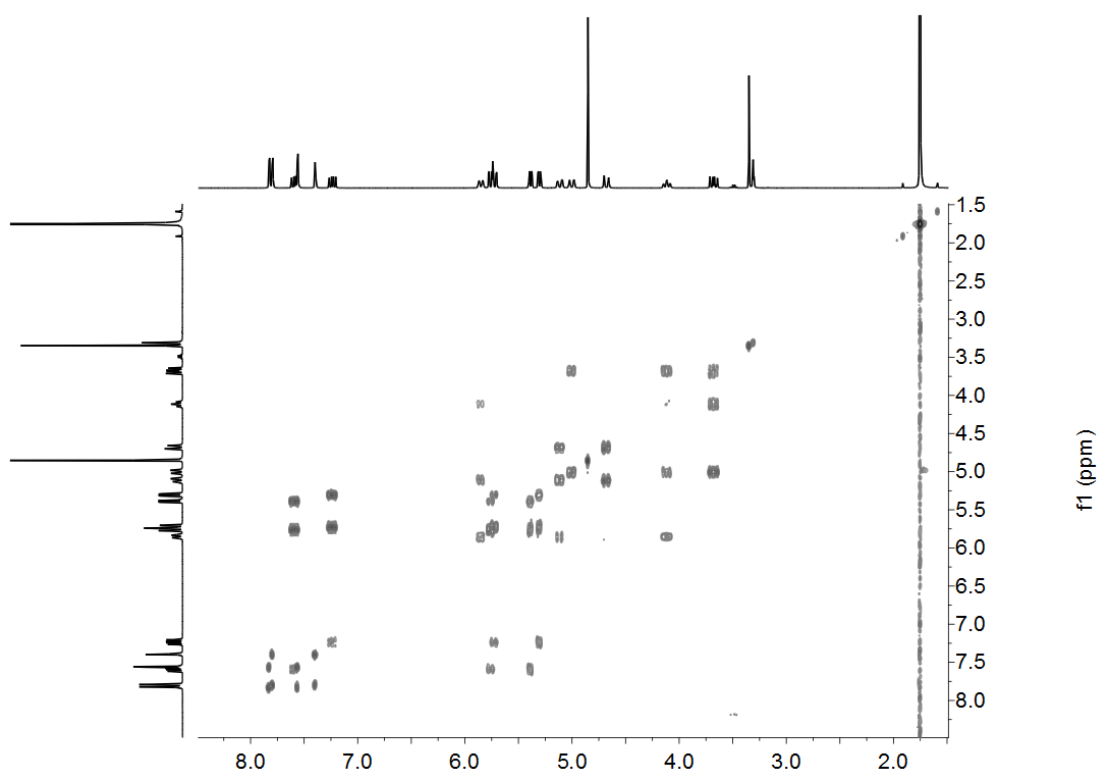

**Fig. S8**  $^1\text{H}$ - $^1\text{H}$  COSY NMR spectrum for **4-(OTf) $_2$**  (400 MHz,  $\text{CD}_3\text{OD}$ ).

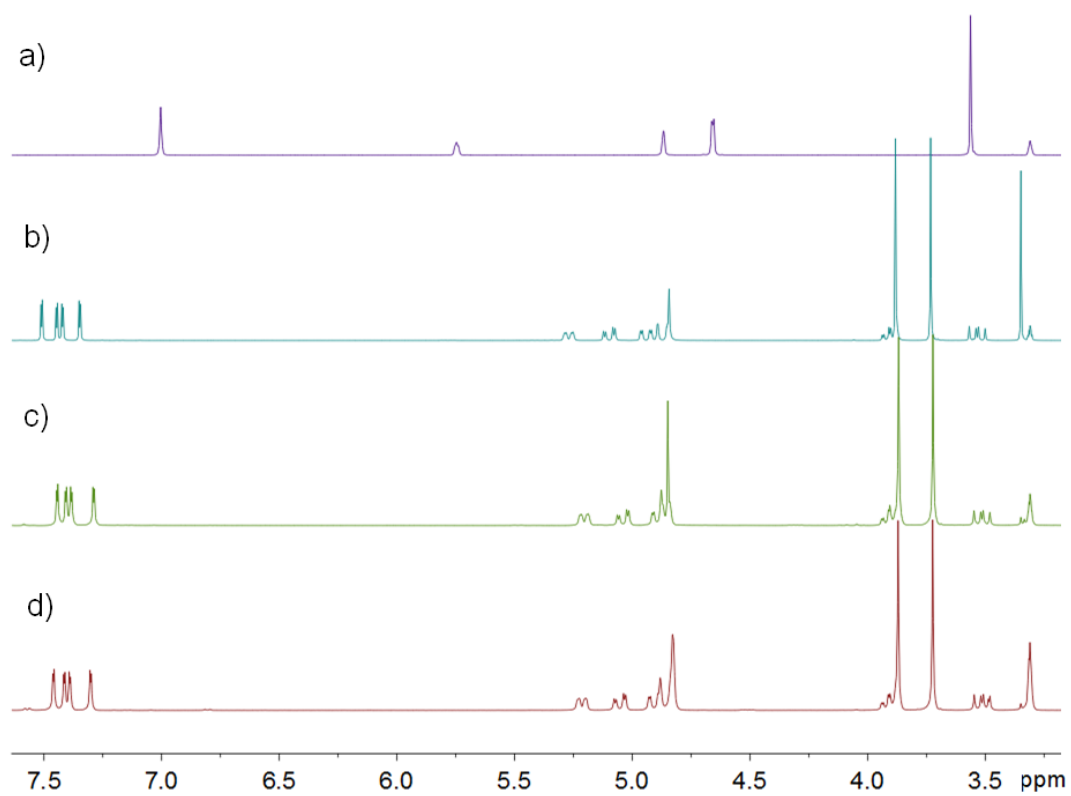

**Fig. S9** Partial  $^1\text{H}$  NMR (400 MHz,  $\text{CD}_3\text{OD}$ ) spectra for a) **L1**, b) **1-Cl<sub>2</sub>**, c) **1-(OTf)<sub>2</sub>**, d) **1-(NO<sub>3</sub>)<sub>2</sub>**.

**Table S1.** Selected bond lengths (Å)

|                                       | <b>M-S</b>                | <b>M-C</b>            | <b>C=C</b> | <b>C=S</b>             |
|---------------------------------------|---------------------------|-----------------------|------------|------------------------|
| <b>L1</b>                             |                           |                       | 1.325(5)   | 1.680(3)               |
| <b>1-Cl<sub>2</sub></b>               | 2.3764(9), 2.3950(8)      | 2.182(3),<br>2.190(3) | 1.411(5)   | 1.721(3), 1.726(4)     |
| <b>1-(OTf)<sub>2</sub></b>            | 2.378(2), 2.413(2)        | 2.197(8),<br>2.218(7) | 1.407(12)  | 1.731(9),<br>1.759(10) |
| <b>1-(NO<sub>3</sub>)<sub>2</sub></b> | 2.3756(17),<br>2.3878(17) | 2.182(6),<br>2.217(6) | 1.392(10)  | 1.709(7), 1.725(7)     |
| <b>4-(OTf)<sub>2</sub></b>            | 2.3778(13),<br>2.3932(13) | 2.238(4),<br>2.239(4) | 1.371(7)   | 1.702(5), 1.720(5)     |
| <b>5</b>                              | 2.4038(13)                |                       | 1.313(10)  | 1.710(5)               |
| <b>7-Cl</b>                           | 2.3229(8), 2.3318(9)      | 2.172(3),<br>2.172(3) | 1.385(5)   | 1.707(3), 1.713(3)     |

**Table S2.** Selected bond angles (°)

|                                       | <b>S-M-S</b> | <b>C-M-C</b> | <b>C-M-S</b>                                |
|---------------------------------------|--------------|--------------|---------------------------------------------|
| <b>1-Cl<sub>2</sub></b>               | 83.09(3)     | 37.67(12)    | 81.07(9), 117.35(9), 93.80(10), 88.36(10)   |
| <b>1-(OTf)<sub>2</sub></b>            | 84.80(9)     | 37.2(3)      | 98.6(2), 79.4(2), 114.5(2), 89.8(2)         |
| <b>1-(NO<sub>3</sub>)<sub>2</sub></b> | 84.12(6)     | 36.9(3)      | 78.75(18), 97.12(18), 113.67(19), 89.03(19) |
| <b>4-(OTf)<sub>2</sub></b>            | 86.94(4)     | 35.67(17)    | 78.45(13), 113.05(13), 97.82(13), 91.01(12) |
| <b>7-Cl</b>                           | 168.41(3)    | 37.17(13)    | 94.63(9), 95.63(8), 96.66(9), 94.96(9)      |

**Table S3.** Selected bond angles (°)

|             | <b>Cl-M-S</b>      | <b>C-S-M</b>           |
|-------------|--------------------|------------------------|
| <b>5</b>    | 94.45(4), 91.20(5) | 109.04(17)             |
| <b>7-Cl</b> | 83.66(3), 85.03(3) | 107.03(11), 108.50(11) |

**X-ray Crystallography Details.** Single crystals of **L1** suitable for X-ray diffraction study were obtained from slow diffusion of diethyl ether into a  $\text{CH}_2\text{Cl}_2$ . Single crystals of **1-Cl<sub>2</sub>**, **1-(OTf)<sub>2</sub>**, **1-(NO<sub>3</sub>)<sub>2</sub>**, **4-(OTf)<sub>2</sub>**, **5** and **7-Cl** suitable for X-ray diffraction study were obtained from slow diffusion of diethyl ether into a  $\text{CH}_3\text{OH}$  solution at room temperature, respectively. In these data, the disordered solvent molecules which could not be restrained properly were removed using the SQUEEZE route. In asymmetric unit of **1-Cl<sub>2</sub>**, there were disordered solvents (three water molecules) which could not be restrained properly. Therefore, SQUEEZE algorithm was used to omit them. 2 DFIX instructions were used to restrain ligand so that there were 2 restraints in the data. Hydrogen of olefin group has been found in a difference Fourier map and others were put in calculated positions. In asymmetric unit of **1-(OTf)<sub>2</sub>**, there was one disordered dichloromethane molecule which could not be restrained properly. Therefore, SQUEEZE algorithm was used to omit it. 6 ISOR and 3 DFIX instructions were used to restrain anions so that there were 39 restraints in the data. In asymmetric unit of **4-(OTf)<sub>2</sub>**, one methanol molecule was disordered and it was divided into two parts (79:51). 1 ISOR and 4 DFIX instructions were used to restrain ligands and solvents so that there were 10 restraints in the data. Hydrogen of one methanol molecule could not be found. Hydrogen of another methanol and H5-6 were found in difference Fourier map and others were put in calculated positions. In asymmetric unit of **5**, 4 ISOR and 1 DFIX instructions were used to restrain ligand and Cp\* fragment so that there were 25 restraints in the data. In asymmetric unit of **7-Cl**, there was disordered solvent (one methanol molecule) which could not be restrained properly. Therefore, SQUEEZE algorithm was used to omit it. 2 DFIX instructions were used to restrain O-H distance of methanol molecules so that there were 2 restraints in the data. Hydrogen of hydroxy groups in methanol molecules have been found by a difference Fourier map and others were put in calculated positions.

**Table S4.** Crystal data and structure refinement for **L1**.

|                                   |                                                               |                                                       |
|-----------------------------------|---------------------------------------------------------------|-------------------------------------------------------|
| Empirical formula                 | C <sub>12</sub> H <sub>16</sub> N <sub>4</sub> S <sub>2</sub> |                                                       |
| Formula weight                    | 280.41                                                        |                                                       |
| Temperature                       | 173(2) K                                                      |                                                       |
| Wavelength                        | 0.71073 Å                                                     |                                                       |
| Crystal system                    | Triclinic                                                     |                                                       |
| Space group                       | P -1                                                          |                                                       |
| Unit cell dimensions              | a = 7.0196(16) Å<br>b = 7.2219(17) Å<br>c = 7.4813(18) Å      | α = 87.479(4)°.<br>β = 65.560(3)°.<br>γ = 78.797(3)°. |
| Volume                            | 338.42(14) Å <sup>3</sup>                                     |                                                       |
| Z                                 | 1                                                             |                                                       |
| Density (calculated)              | 1.376 Mg/m <sup>3</sup>                                       |                                                       |
| Absorption coefficient            | 0.381 mm <sup>-1</sup>                                        |                                                       |
| F(000)                            | 148                                                           |                                                       |
| Crystal size                      | 0.180 x 0.120 x 0.080 mm <sup>3</sup>                         |                                                       |
| Theta range for data collection   | 2.878 to 26.999°.                                             |                                                       |
| Index ranges                      | -8 ≤ h ≤ 8, -9 ≤ k ≤ 8, -9 ≤ l ≤ 9                            |                                                       |
| Reflections collected             | 2370                                                          |                                                       |
| Independent reflections           | 1445 [R(int) = 0.0167]                                        |                                                       |
| Completeness to theta = 25.242°   | 97.8 %                                                        |                                                       |
| Absorption correction             | Semi-empirical from equivalents                               |                                                       |
| Max. and min. transmission        | 0.746 and 0.690                                               |                                                       |
| Refinement method                 | Full-matrix least-squares on F <sup>2</sup>                   |                                                       |
| Data / restraints / parameters    | 1445 / 0 / 83                                                 |                                                       |
| Goodness-of-fit on F <sup>2</sup> | 1.147                                                         |                                                       |
| Final R indices [I > 2σ(I)]       | R1 = 0.0462, wR2 = 0.1533                                     |                                                       |
| R indices (all data)              | R1 = 0.0601, wR2 = 0.2158                                     |                                                       |
| Extinction coefficient            | n/a                                                           |                                                       |
| Largest diff. peak and hole       | 0.599 and -0.453 e.Å <sup>-3</sup>                            |                                                       |

**Table S5.** Crystal data and structure refinement for **1-Cl<sub>2</sub>**.

|                                   |                                                                                                               |
|-----------------------------------|---------------------------------------------------------------------------------------------------------------|
| Empirical formula                 | C <sub>22</sub> H <sub>37</sub> Cl <sub>2</sub> Ir N <sub>4</sub> O <sub>3</sub> S <sub>2</sub>               |
| Formula weight                    | 732.77                                                                                                        |
| Temperature                       | 203(2) K                                                                                                      |
| Wavelength                        | 0.71073 Å                                                                                                     |
| Crystal system                    | Monoclinic                                                                                                    |
| Space group                       | C 2/c                                                                                                         |
| Unit cell dimensions              | a = 12.2789(8) Å      α = 90°.<br>b = 23.1197(16) Å      β = 90.0720(10)°.<br>c = 19.1348(13) Å      γ = 90°. |
| Volume                            | 5432.1(6) Å <sup>3</sup>                                                                                      |
| Z                                 | 8                                                                                                             |
| Density (calculated)              | 1.792 Mg/m <sup>3</sup>                                                                                       |
| Absorption coefficient            | 5.298 mm <sup>-1</sup>                                                                                        |
| F(000)                            | 2912                                                                                                          |
| Crystal size                      | 0.380 x 0.360 x 0.340 mm <sup>3</sup>                                                                         |
| Theta range for data collection   | 1.878 to 27.362°.                                                                                             |
| Index ranges                      | -15 ≤ h ≤ 15, -29 ≤ k ≤ 29, -20 ≤ l ≤ 24                                                                      |
| Reflections collected             | 19418                                                                                                         |
| Independent reflections           | 6117 [R(int) = 0.0273]                                                                                        |
| Completeness to theta = 25.242°   | 99.5 %                                                                                                        |
| Absorption correction             | Semi-empirical from equivalents                                                                               |
| Max. and min. transmission        | 0.746 and 0.612                                                                                               |
| Refinement method                 | Full-matrix least-squares on F <sup>2</sup>                                                                   |
| Data / restraints / parameters    | 6117 / 2 / 295                                                                                                |
| Goodness-of-fit on F <sup>2</sup> | 1.114                                                                                                         |
| Final R indices [I > 2σ(I)]       | R1 = 0.0210, wR2 = 0.0598                                                                                     |
| R indices (all data)              | R1 = 0.0275, wR2 = 0.0620                                                                                     |
| Extinction coefficient            | n/a                                                                                                           |
| Largest diff. peak and hole       | 1.012 and -1.483 e.Å <sup>-3</sup>                                                                            |

**Table S6.** Crystal data and structure refinement for **1-(OTf)<sub>2</sub>**.

|                                   |                                                                                                                                                                       |
|-----------------------------------|-----------------------------------------------------------------------------------------------------------------------------------------------------------------------|
| Empirical formula                 | C <sub>25</sub> H <sub>33</sub> Cl <sub>2</sub> F <sub>6</sub> Ir N <sub>4</sub> O <sub>6</sub> S <sub>4</sub>                                                        |
| Formula weight                    | 990.89                                                                                                                                                                |
| Temperature                       | 293(2) K                                                                                                                                                              |
| Wavelength                        | 0.71073 Å                                                                                                                                                             |
| Crystal system                    | Triclinic                                                                                                                                                             |
| Space group                       | P -1                                                                                                                                                                  |
| Unit cell dimensions              | a = 11.944(3) Å                      α = 106.941(3)°.<br>b = 12.599(3) Å                      β = 91.963(3)°.<br>c = 12.787(3) Å                      γ = 93.828(3)°. |
| Volume                            | 1833.7(8) Å <sup>3</sup>                                                                                                                                              |
| Z                                 | 2                                                                                                                                                                     |
| Density (calculated)              | 1.795 Mg/m <sup>3</sup>                                                                                                                                               |
| Absorption coefficient            | 4.087 mm <sup>-1</sup>                                                                                                                                                |
| F(000)                            | 976                                                                                                                                                                   |
| Crystal size                      | 0.120 x 0.100 x 0.080 mm <sup>3</sup>                                                                                                                                 |
| Theta range for data collection   | 1.667 to 25.008°.                                                                                                                                                     |
| Index ranges                      | -12 ≤ h ≤ 14, -14 ≤ k ≤ 10, -15 ≤ l ≤ 14                                                                                                                              |
| Reflections collected             | 8325                                                                                                                                                                  |
| Independent reflections           | 6182 [R(int) = 0.0290]                                                                                                                                                |
| Completeness to theta = 25.242°   | 93.1 %                                                                                                                                                                |
| Absorption correction             | Semi-empirical from equivalents                                                                                                                                       |
| Max. and min. transmission        | 0.746 and 0.638                                                                                                                                                       |
| Refinement method                 | Full-matrix least-squares on F <sup>2</sup>                                                                                                                           |
| Data / restraints / parameters    | 6182 / 39 / 413                                                                                                                                                       |
| Goodness-of-fit on F <sup>2</sup> | 1.025                                                                                                                                                                 |
| Final R indices [I > 2σ(I)]       | R1 = 0.0486, wR2 = 0.1168                                                                                                                                             |
| R indices (all data)              | R1 = 0.0698, wR2 = 0.1255                                                                                                                                             |
| Extinction coefficient            | n/a                                                                                                                                                                   |
| Largest diff. peak and hole       | 1.621 and -1.072 e.Å <sup>-3</sup>                                                                                                                                    |



**Table S7.** Crystal data and structure refinement for **1-(NO<sub>3</sub>)<sub>2</sub>**.

|                                   |                                                                                                |                   |
|-----------------------------------|------------------------------------------------------------------------------------------------|-------------------|
| Empirical formula                 | C <sub>44</sub> H <sub>62</sub> Ir <sub>2</sub> N <sub>12</sub> O <sub>12</sub> S <sub>4</sub> |                   |
| Formula weight                    | 1463.69                                                                                        |                   |
| Temperature                       | 173(2) K                                                                                       |                   |
| Wavelength                        | 0.71073 Å                                                                                      |                   |
| Crystal system                    | Triclinic                                                                                      |                   |
| Space group                       | P -1                                                                                           |                   |
| Unit cell dimensions              | a = 10.7834(7) Å                                                                               | α = 70.6920(10)°. |
|                                   | b = 11.3480(7) Å                                                                               | β = 75.0870(10)°. |
|                                   | c = 11.3793(7) Å                                                                               | γ = 82.5810(10)°. |
| Volume                            | 1268.42(14) Å <sup>3</sup>                                                                     |                   |
| Z                                 | 1                                                                                              |                   |
| Density (calculated)              | 1.916 Mg/m <sup>3</sup>                                                                        |                   |
| Absorption coefficient            | 5.479 mm <sup>-1</sup>                                                                         |                   |
| F(000)                            | 724                                                                                            |                   |
| Crystal size                      | 0.240 x 0.200 x 0.180 mm <sup>3</sup>                                                          |                   |
| Theta range for data collection   | 1.948 to 25.599°.                                                                              |                   |
| Index ranges                      | -12 ≤ h ≤ 13, -13 ≤ k ≤ 13, -11 ≤ l ≤ 13                                                       |                   |
| Reflections collected             | 6333                                                                                           |                   |
| Independent reflections           | 4668 [R(int) = 0.0123]                                                                         |                   |
| Completeness to theta = 25.242°   | 97.6 %                                                                                         |                   |
| Absorption correction             | Semi-empirical from equivalents                                                                |                   |
| Max. and min. transmission        | 0.746 and 0.622                                                                                |                   |
| Refinement method                 | Full-matrix least-squares on F <sup>2</sup>                                                    |                   |
| Data / restraints / parameters    | 4668 / 0 / 341                                                                                 |                   |
| Goodness-of-fit on F <sup>2</sup> | 1.229                                                                                          |                   |
| Final R indices [I > 2σ(I)]       | R1 = 0.0254, wR2 = 0.0674                                                                      |                   |
| R indices (all data)              | R1 = 0.0297, wR2 = 0.1049                                                                      |                   |
| Extinction coefficient            | n/a                                                                                            |                   |
| Largest diff. peak and hole       | 2.895 and -1.311 e.Å <sup>-3</sup>                                                             |                   |

**Table S8.** Crystal data and structure refinement for **4-(OTf)<sub>2</sub>**.

|                                   |                                                                                                                             |
|-----------------------------------|-----------------------------------------------------------------------------------------------------------------------------|
| Empirical formula                 | C <sub>28</sub> H <sub>39</sub> F <sub>6</sub> N <sub>4</sub> O <sub>8</sub> Rh S <sub>4</sub>                              |
| Formula weight                    | 904.78                                                                                                                      |
| Temperature                       | 173(2) K                                                                                                                    |
| Wavelength                        | 0.71073 Å                                                                                                                   |
| Crystal system                    | Triclinic                                                                                                                   |
| Space group                       | P -1                                                                                                                        |
| Unit cell dimensions              | a = 11.3390(15) Å      α = 105.937(3)°.<br>b = 13.3112(18) Å      β = 107.966(3)°.<br>c = 14.488(3) Å      γ = 106.131(2)°. |
| Volume                            | 1836.4(5) Å <sup>3</sup>                                                                                                    |
| Z                                 | 2                                                                                                                           |
| Density (calculated)              | 1.636 Mg/m <sup>3</sup>                                                                                                     |
| Absorption coefficient            | 0.775 mm <sup>-1</sup>                                                                                                      |
| F(000)                            | 924                                                                                                                         |
| Crystal size                      | 0.240 x 0.060 x 0.040 mm <sup>3</sup>                                                                                       |
| Theta range for data collection   | 1.608 to 27.483°.                                                                                                           |
| Index ranges                      | -14 ≤ h ≤ 14, -17 ≤ k ≤ 17, -17 ≤ l ≤ 18                                                                                    |
| Reflections collected             | 13482                                                                                                                       |
| Independent reflections           | 8262 [R(int) = 0.0335]                                                                                                      |
| Completeness to theta = 25.242°   | 98.2 %                                                                                                                      |
| Absorption correction             | Semi-empirical from equivalents                                                                                             |
| Max. and min. transmission        | 0.746 and 0.687                                                                                                             |
| Refinement method                 | Full-matrix least-squares on F <sup>2</sup>                                                                                 |
| Data / restraints / parameters    | 8262 / 10 / 477                                                                                                             |
| Goodness-of-fit on F <sup>2</sup> | 1.066                                                                                                                       |
| Final R indices [I > 2σ(I)]       | R1 = 0.0459, wR2 = 0.1057                                                                                                   |
| R indices (all data)              | R1 = 0.0731, wR2 = 0.1420                                                                                                   |
| Extinction coefficient            | n/a                                                                                                                         |
| Largest diff. peak and hole       | 0.748 and -0.572 e.Å <sup>-3</sup>                                                                                          |

**Table S9.** Crystal data and structure refinement for **5**.

|                                   |                                                                                               |                 |
|-----------------------------------|-----------------------------------------------------------------------------------------------|-----------------|
| Empirical formula                 | C <sub>32</sub> H <sub>46</sub> Cl <sub>4</sub> N <sub>4</sub> Rh <sub>2</sub> S <sub>2</sub> |                 |
| Formula weight                    | 898.47                                                                                        |                 |
| Temperature                       | 173(2) K                                                                                      |                 |
| Wavelength                        | 0.71073 Å                                                                                     |                 |
| Crystal system                    | Triclinic                                                                                     |                 |
| Space group                       | P -1                                                                                          |                 |
| Unit cell dimensions              | a = 8.7048(16) Å                                                                              | α = 72.896(3)°. |
|                                   | b = 8.8755(16) Å                                                                              | β = 82.099(3)°. |
|                                   | c = 14.672(3) Å                                                                               | γ = 74.103(3)°. |
| Volume                            | 1039.9(3) Å <sup>3</sup>                                                                      |                 |
| Z                                 | 1                                                                                             |                 |
| Density (calculated)              | 1.435 Mg/m <sup>3</sup>                                                                       |                 |
| Absorption coefficient            | 1.176 mm <sup>-1</sup>                                                                        |                 |
| F(000)                            | 456                                                                                           |                 |
| Crystal size                      | 0.300 x 0.150 x 0.060 mm <sup>3</sup>                                                         |                 |
| Theta range for data collection   | 2.437 to 27.502°.                                                                             |                 |
| Index ranges                      | -11 ≤ h ≤ 11, -11 ≤ k ≤ 11, -19 ≤ l ≤ 15                                                      |                 |
| Reflections collected             | 7495                                                                                          |                 |
| Independent reflections           | 4692 [R(int) = 0.0246]                                                                        |                 |
| Completeness to theta = 25.242°   | 98.0 %                                                                                        |                 |
| Absorption correction             | Semi-empirical from equivalents                                                               |                 |
| Max. and min. transmission        | 0.746 and 0.621                                                                               |                 |
| Refinement method                 | Full-matrix least-squares on F <sup>2</sup>                                                   |                 |
| Data / restraints / parameters    | 4692 / 25 / 205                                                                               |                 |
| Goodness-of-fit on F <sup>2</sup> | 1.062                                                                                         |                 |
| Final R indices [I > 2σ(I)]       | R1 = 0.0491, wR2 = 0.1551                                                                     |                 |
| R indices (all data)              | R1 = 0.0625, wR2 = 0.1660                                                                     |                 |
| Extinction coefficient            | n/a                                                                                           |                 |
| Largest diff. peak and hole       | 0.847 and -0.963 e.Å <sup>-3</sup>                                                            |                 |

**Table S10.** Crystal data and structure refinement for **7-Cl**.

|                                   |                                                                                                                                                         |
|-----------------------------------|---------------------------------------------------------------------------------------------------------------------------------------------------------|
| Empirical formula                 | C <sub>15</sub> H <sub>28</sub> Cl <sub>2</sub> N <sub>4</sub> O <sub>3</sub> Pd S <sub>2</sub>                                                         |
| Formula weight                    | 553.83                                                                                                                                                  |
| Temperature                       | 173(2) K                                                                                                                                                |
| Wavelength                        | 0.71073 Å                                                                                                                                               |
| Crystal system                    | Monoclinic                                                                                                                                              |
| Space group                       | P 21/c                                                                                                                                                  |
| Unit cell dimensions              | a = 15.409(2) Å                      α = 90°.<br>b = 7.4204(10) Å                     β = 100.341(2)°.<br>c = 20.302(3) Å                      γ = 90°. |
| Volume                            | 2283.6(5) Å <sup>3</sup>                                                                                                                                |
| Z                                 | 4                                                                                                                                                       |
| Density (calculated)              | 1.611 Mg/m <sup>3</sup>                                                                                                                                 |
| Absorption coefficient            | 1.252 mm <sup>-1</sup>                                                                                                                                  |
| F(000)                            | 1128                                                                                                                                                    |
| Crystal size                      | 0.250 x 0.200 x 0.180 mm <sup>3</sup>                                                                                                                   |
| Theta range for data collection   | 2.232 to 27.442°.                                                                                                                                       |
| Index ranges                      | -19 ≤ h ≤ 18, -9 ≤ k ≤ 9, -23 ≤ l ≤ 26                                                                                                                  |
| Reflections collected             | 15757                                                                                                                                                   |
| Independent reflections           | 5176 [R(int) = 0.0345]                                                                                                                                  |
| Completeness to theta = 25.242°   | 99.3 %                                                                                                                                                  |
| Absorption correction             | Semi-empirical from equivalents                                                                                                                         |
| Max. and min. transmission        | 0.746 and 0.584                                                                                                                                         |
| Refinement method                 | Full-matrix least-squares on F <sup>2</sup>                                                                                                             |
| Data / restraints / parameters    | 5176 / 2 / 238                                                                                                                                          |
| Goodness-of-fit on F <sup>2</sup> | 1.066                                                                                                                                                   |
| Final R indices [I > 2σ(I)]       | R1 = 0.0350, wR2 = 0.0925                                                                                                                               |
| R indices (all data)              | R1 = 0.0427, wR2 = 0.0998                                                                                                                               |
| Extinction coefficient            | n/a                                                                                                                                                     |
| Largest diff. peak and hole       | 0.651 and -0.717 e.Å <sup>-3</sup>                                                                                                                      |
